# Supplementary material
Source: ML conference proceedings conference paper supplement (https://openreview.net/forum?id=r0JMLPgGXS_)
Supplement: supplementary_material [file attachment]

| Model              | NLL<br>$\pi = 0^*$ | NLL<br>$\pi = 0.5$ | NLL<br>$\pi = 1$ |
|--------------------|--------------------|--------------------|------------------|
| NCPN (ML)          | 2.25               | 3.72               | 4.35             |
| NCPN (NCML VE)     | 2.22               | 3.63               | 4.21             |
| NPCN (NCML sub-VP) | 2.31               | 3.44               | 3.98             |
| NCPN (NCML VP)     | 2.48               | 3.14               | 3.67             |

Table 2: Results on CelebA 64x64. Negative log-likelihood (NLL) is in bits per dimension. Lower is better. \*NLL with  $\pi = 0$  is equivalent to NLL of the original data.

## A APPENDIX

### A.1 ADDITIONAL EXPERIMENTAL DETAILS

We compare against Kingma et al. (2021); Song et al. (2021); Child (2020); Ho et al. (2019); Grcić et al. (2021); Van Den Oord et al. (2016); Chen et al. (2018); Child et al. (2019). Some results could not be included due to the irreproducibility of the techniques.

For our NCML-trained models, the diffusion times of the VE, VP, and sub-VP SDEs were chosen to be  $t = 0.5$ ,  $t = 0.1$ , and  $t = 0.025$ , respectively. The values are somewhat arbitrary, but chosen such that the standard deviation of the per-pixel differences between samples in  $p_{data}$  and their noised counterparts in  $p_T$  was  $\approx 10$ . We suspect that further improvements can be made to the empirical results if these numbers were chosen more judiciously.

### A.2 ADDITIONAL FIGURES AND TABLES

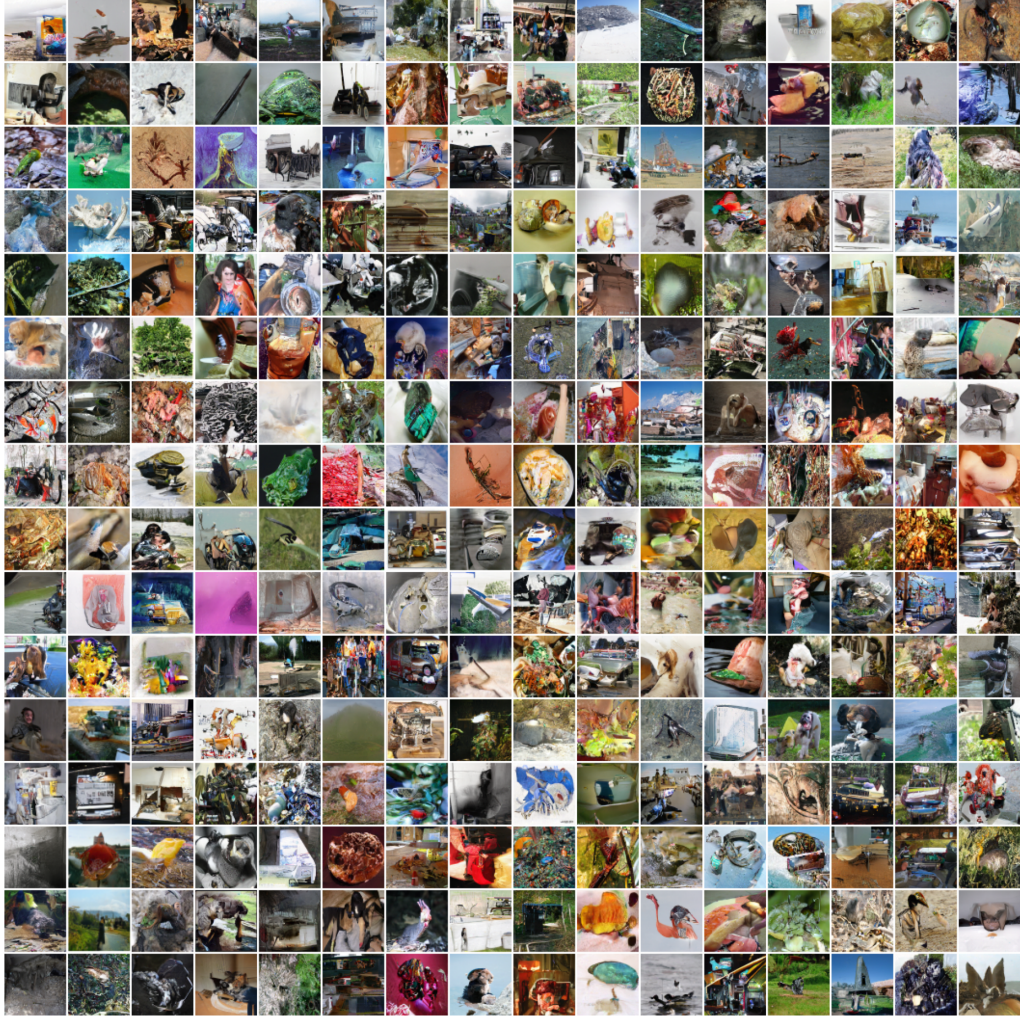

Figure 6: Samples from NCPN trained on ImageNet 64x64, with  $p_t$  as a variance preserving (VP) diffusion process.

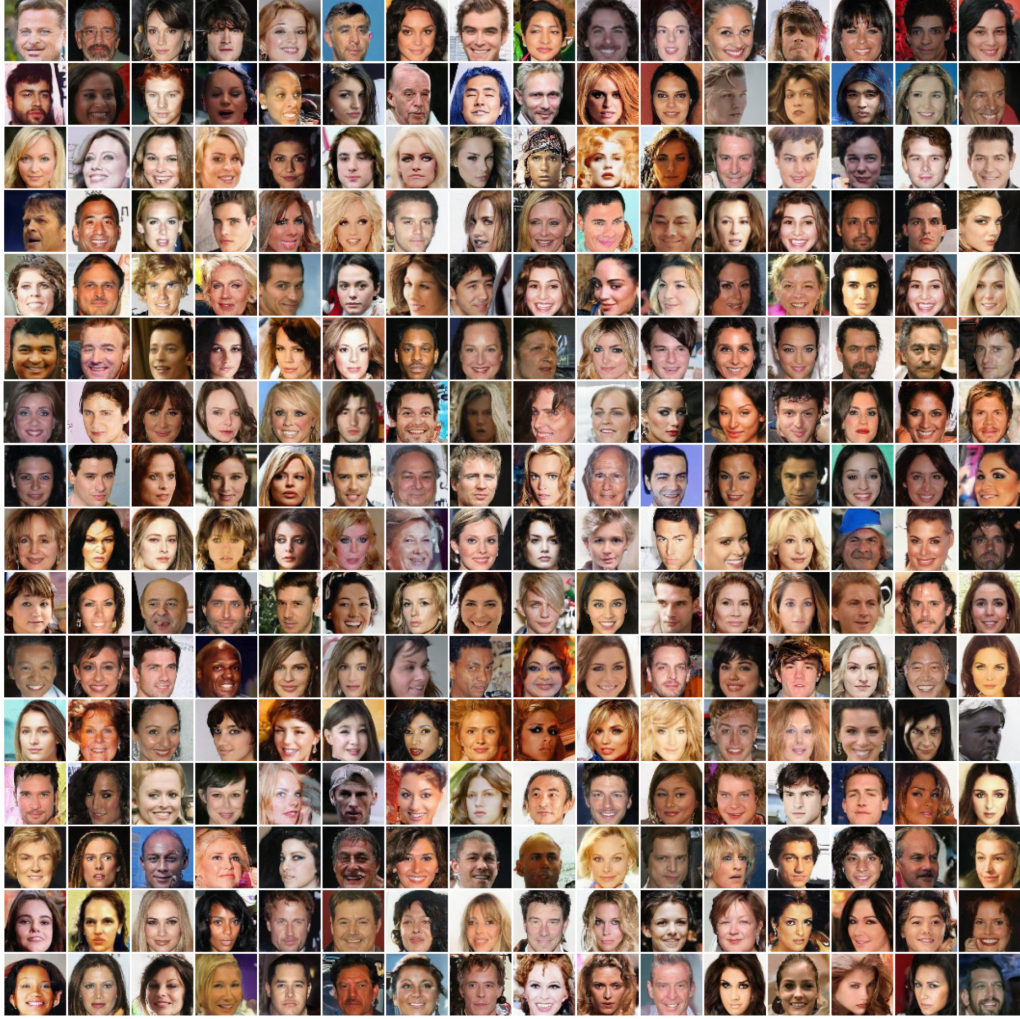

Figure 7: Samples from NCPN trained on CelebA 64x64, with  $p_t$  as a variance preserving (VP) diffusion process.

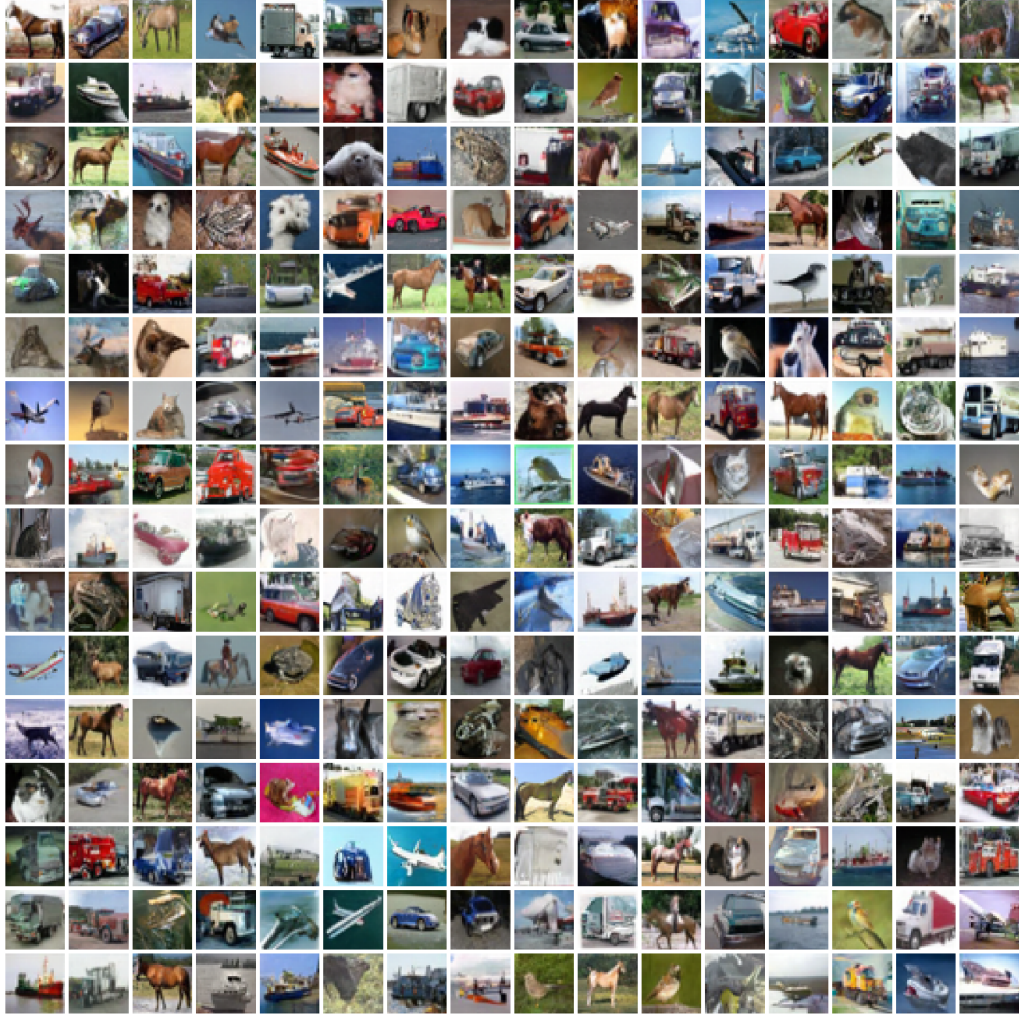

Figure 8: Samples from NCPN trained on CIFAR-10, with  $p_t$  as a variance preserving (VP) diffusion process.

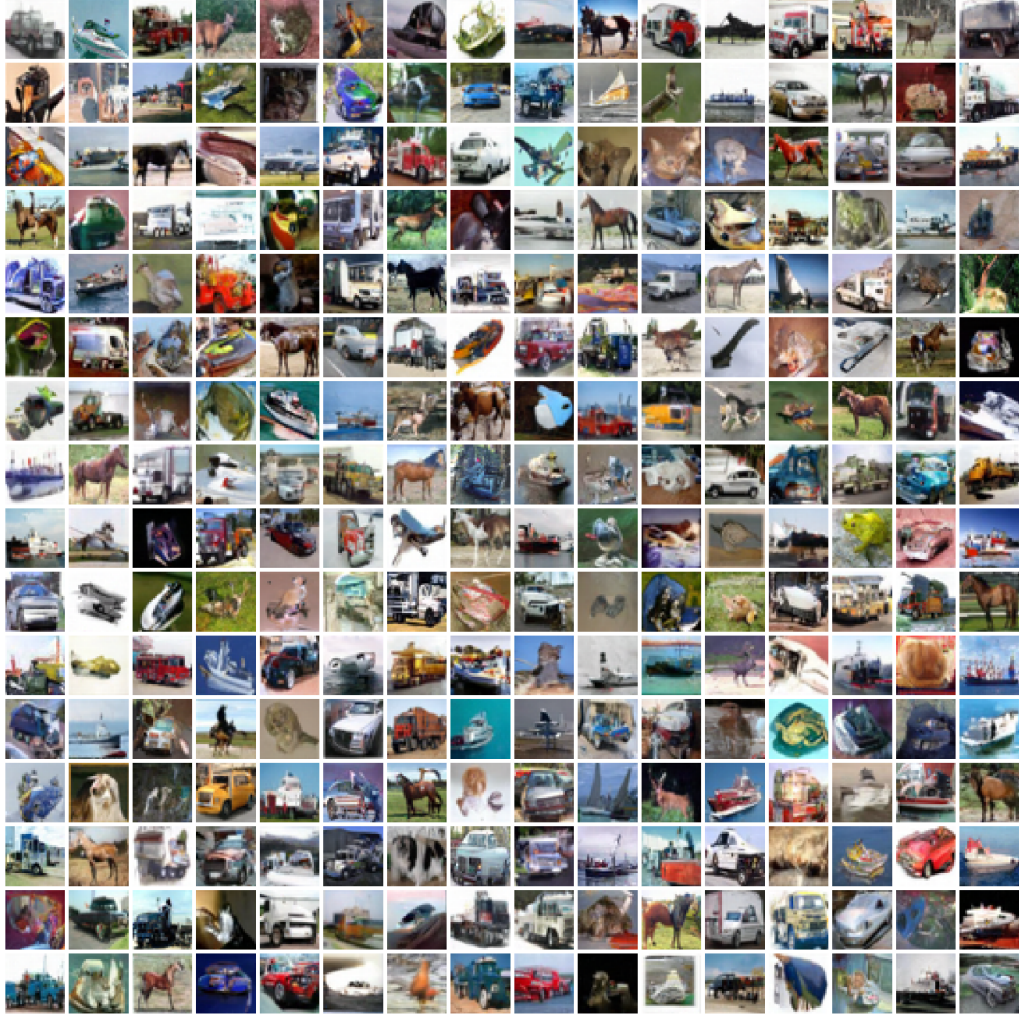

Figure 9: Samples from NCPN trained on CIFAR-10, with  $p_t$  as a sub-variance preserving (sub-VP) diffusion process.

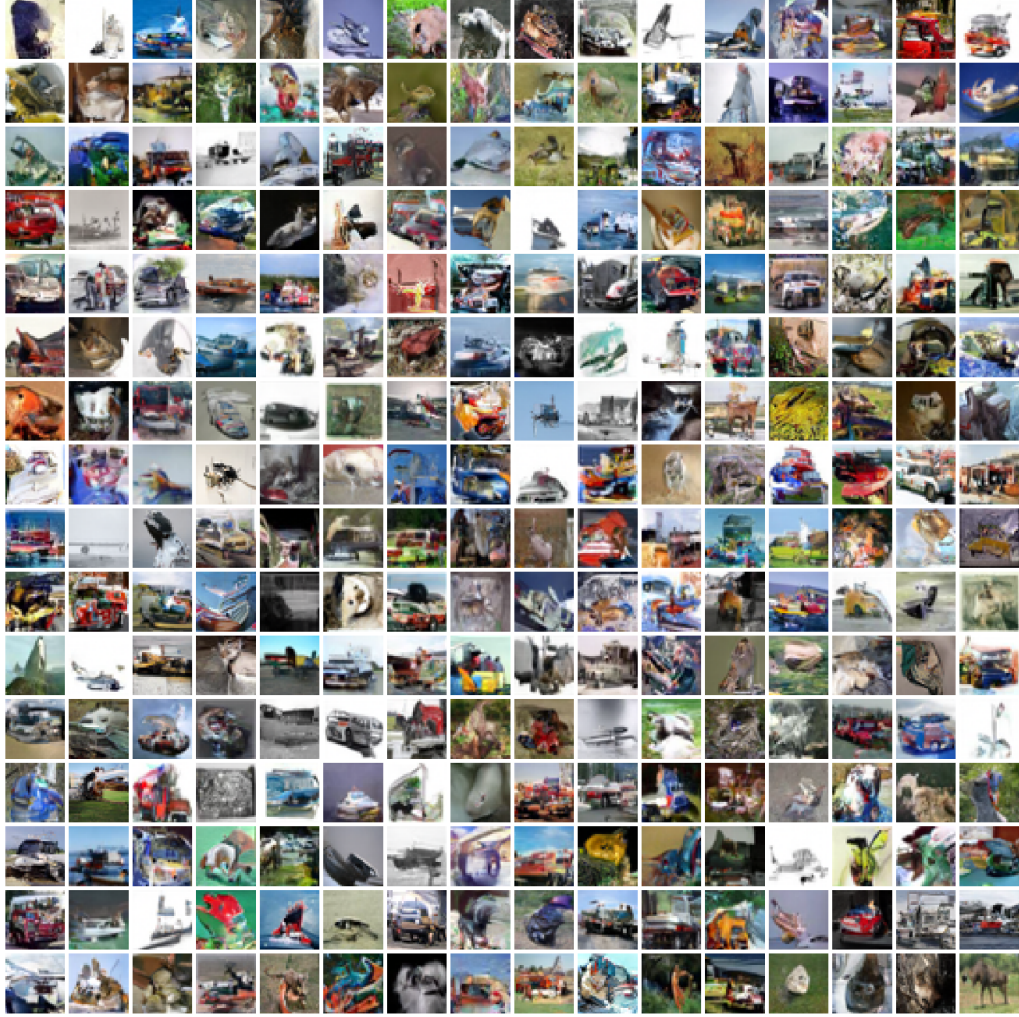

Figure 10: Samples from NCPN trained on CIFAR-10, with  $p_t$  as a variance exploding (VE) diffusion process.
